# Supplementary material
Source: publisher site journal article supplement (https://www.dovepress.com/get_supplementary_file.php?f=473089.docx)
Supplement: Supplementary file 1 [file get_supplementary_file.php]

**Table S1** Weighted baseline characteristics of non-diabetic women stratified by TyG index tertiles

| **Variables** | **T1**  **(n=3819)** | **T2**  **(n=3250)** | **T3**  **(n=2932)** | **P-value** |
| --- | --- | --- | --- | --- |
| Age(years) | 41.22±15.28 | 47.63±16.89 | 51.61±16.51 | < 0.0001 |
| Race/ethnicity |  |  |  | < 0.0001 |
| Non-Hispanic White | 64.99 | 72.27 | 76.22 |  |
| Non-Hispanic Black | 16.37 | 8.35 | 4.61 |  |
| Mexican American | 6.18 | 7.83 | 8.47 |  |
| Others | 12.47 | 11.55 | 10.7 |  |
| Education |  |  |  | < 0.0001 |
| Below high school | 3.95 | 6.17 | 7.44 |  |
| High school graduate | 26.97 | 34.85 | 40.70 |  |
| Higher | 69.08 | 59.98 | 51.87 |  |
| Marital status |  |  |  | < 0.1677 |
| Married/partnered | 62.56 | 62.26 | 65.64 |  |
| Never married /divorced/separated/widowed | 37.44 | 37.74 | 34.36 |  |
| PIR |  |  |  | < 0.0014 |
| Low | 20.92 | 23.12 | 24.61 |  |
| Medium | 34.32 | 36.19 | 37.83 |  |
| High | 44.75 | 40.69 | 37.56 |  |
| Drinking |  |  |  | 0.0002 |
| No | 29.14 | 32.61 | 36.36 |  |
| Yes | 70.86 | 67.39 | 63.64 |  |
| Smoking |  |  |  | < 0.0001 |
| No | 65.37 | 58.56 | 53.29 |  |
| Yes | 34.63 | 41.44 | 46.71 |  |
| BMI (kg/m2) | 26.30 ± 6.51 | 28.86 ± 7.04 | 30.10 ± 6.75 | < 0.0001 |
| Waist circumference (cm) | 87.78±15.64 | 96.33±16.63 | 102.58±16.08 | < 0.0001 |
| Cardiovascular disease |  |  |  | < 0.0003 |
| No | 99.09 | 98.66 | 97.46 |  |
| Yes | 0.91 | 1.34 | 2.54 |  |
| Hypertension |  |  |  | <0.0001 |
| No | 86.44 | 74.58 | 65.79 |  |
| Yes | 13.56 | 25.42 | 34.21 |  |
| HCH |  |  |  | <0.0001 |
| No | 75.78 | 54.74 | 38.64 |  |
| Yes | 24.22 | 45.26 | 61.36 |  |
| COPD |  |  |  | <0.0001 |
| No | 94.87 | 92.25 | 87.41 |  |
| Yes | 5.13 | 7.75 | 12.59 |  |
| TyG index | 7.95±0.29 | 8.61±0.16 | 9.25±0.31 | <0.0001 |

**Note:** The continuous variables were represented by mean ± SD. Categorical variables expressed as percentages. Absolute numbers are unweighted, observed values; Estimates were weighted.

**Abbreviations:** BMI, body mass index; PIR, poverty income ratio; HCH, hypercholesterolemia; COPD, chronic obstructive pulmonary disease; TyG index, Triglyceride-Glucose index.

**Table S2** Weighted baseline characteristics of non-diabetic men stratified by TyG index tertiles

| **Variables** | **T1**  **(n=3819)** | **T2**  **(n=3250)** | **T3**  **(n=2932)** | **P-value** |
| --- | --- | --- | --- | --- |
| Age(years) | 41.41±16.67 | 44.57±16.18 | 45.56±14.54 | < 0.0001 |
| Race/ethnicity |  |  |  | < 0.0001 |
| Non-Hispanic White | 66.42 | 70.46 | 72.20 |  |
| Non-Hispanic Black | 16.02 | 8.62 | 5.16 |  |
| Mexican American | 8.66 | 6.80 | 9.23 |  |
| Others | 10.76 | 11.69 | 12.77 |  |
| Education |  |  |  | 0.4405 |
| Below high school | 5.40 | 5.79 | 6.62 |  |
| High school graduate | 35.85 | 36.04 | 36.93 |  |
| Higher | 58.75 | 58.17 | 56.45 |  |
| Marital status |  |  |  | < 0.0001 |
| Married/partnered | 61.99 | 69.46 | 72.01 |  |
| Never married /divorced/separated/widowed | 38.01 | 30.54 | 27.99 |  |
| PIR |  |  |  | 0.2622 |
| Low | 19.60 | 17.30 | 18.05 |  |
| Medium | 36.99 | 35.40 | 36.31 |  |
| High | 43.41 | 47.29 | 45.64 |  |
| Drinking |  |  |  | 0.6633 |
| No | 15.06 | 13.93 | 14.20 |  |
| Yes | 84.94 | 86.07 | 85.80 |  |
| Smoking |  |  |  | < 0.0001 |
| No | 52.02 | 45.91 | 43.09 |  |
| Yes | 47.98 | 54.09 | 56.91 |  |
| BMI (kg/m2) | 26.01 ± 4.96 | 28.06 ± 5.62 | 29.95 ± 5.59 | < 0.0001 |
| Waist circumference (cm) | 93.65±14.34 | 99.53±15.65 | 105.06±16.50 | < 0.0001 |
| Cardiovascular disease |  |  |  | < 0.0003 |
| No | 98.74 | 98.52 | 97.59 |  |
| Yes | 1.26 | 1.48 | 2.41 |  |
| Hypertension |  |  |  | <0.0001 |
| No | 86.25 | 80.35 | 75.20 |  |
| Yes | 13.75 | 19.65 | 24.80 |  |
| HCH |  |  |  | <0.0001 |
| No | 71.84 | 57.79 | 46.71 |  |
| Yes | 28.16 | 42.21 | 53.29 |  |
| COPD |  |  |  | <0.0195 |
| No | 95.98 | 95.23 | 93.71 |  |
| Yes | 4.02 | 4.77 | 6.29 |  |
| TyG index | 7.99±0.29 | 8.62±0.16 | 9.35±0.40 | <0.0001 |

**Note:** The continuous variables were represented by mean ± SD. Categorical variables expressed as percentages. Absolute numbers are unweighted, observed values; Estimates were weighted.

**Abbreviations:** BMI, body mass index; PIR, poverty income ratio; HCH, hypercholesterolemia; COPD, chronic obstructive pulmonary disease; TyG index, Triglyceride-Glucose index.

**Table S3** Weighted baseline characteristics of diabetic women stratified by TyG index tertiles

| **Variables** | **T1**  **(n=701)** | **T2**  **(n=739)** | **T3**  **(n=689)** | **P-value** |
| --- | --- | --- | --- | --- |
| Age (years) | 59.03±16.16 | 61.88±14.49 | 59.55±14.16 | 0.0775 |
| Race/ethnicity |  |  |  | <0.0001 |
| Non-Hispanic White | 52.57 | 54.75 | 63.93 |  |
| Non-Hispanic Black | 30.53 | 23.25 | 11.77 |  |
| Mexican American | 4.68 | 8.79 | 10.43 |  |
| Others | 12.22 | 13.21 | 13.87 |  |
| Education |  |  |  | 0.0031 |
| Below high school | 6.29 | 12.56 | 14.33 |  |
| High school graduate | 36.93 | 44.64 | 45.02 |  |
| Higher | 56.77 | 42.81 | 40.64 |  |
| Marital status |  |  |  | 0.8423 |
| Married/partnered | 51.34 | 52.08 | 53.52 |  |
| Never married /divorced/ separated/widowed | 48.66 | 47.92 | 46.48 |  |
| PIR |  |  |  | 0.0812 |
| Low | 26.24 | 30.29 | 30.82 |  |
| Medium | 37.86 | 42.06 | 46.02 |  |
| High | 35.90 | 27.65 | 23.16 |  |
| Drinking |  |  |  | 0.2861 |
| No | 42.87 | 45.97 | 49.86 |  |
| Yes | 57.13 | 54.03 | 50.14 |  |
| Smoking |  |  |  | 0.1056 |
| No | 60.43 | 63.60 | 55.79 |  |
| Yes | 39.57 | 36.40 | 44.21 |  |
| BMI (kg/m2) | 31.23±8.31 | 31.89±8.40 | 33.42±7.26 | 0.0011 |
| Waist circumference (cm) | 101.23±19.03 | 102.94±15.55 | 109.70±15.83 | <0.0001 |
| COPD |  |  |  | 0.205 |
| No | 92.35 | 87.67 | 85.94 |  |
| Yes | 7.65 | 12.33 | 14.06 |  |
| Hypertension |  |  |  | 0.344 |
| No | 48.15 | 40.28 | 43.23 |  |
| Yes | 51.85 | 59.72 | 56.77 |  |
| Cardiovascular disease |  |  |  | 0.8866 |
| No | 92.09 | 91.70 | 92.52 |  |
| Yes | 7.91 | 8.30 | 7.48 |  |
| HCH |  |  |  | <0.0001 |
| No | 53.63 | 40.61 | 31.03 |  |
| Yes | 46.37 | 59.39 | 68.97 |  |
| TyG index | 8.07 ±0.24 | 8.67 ±0.15 | 9.56±0.56 | <0.0001 |

**Note:** The continuous variables were represented by mean ± SD. Categorical variables expressed as percentages. Absolute numbers are unweighted, observed values; Estimates were weighted.

**Abbreviations:** BMI, body mass index; PIR, poverty income ratio; HCH, hypercholesterolemia; COPD, chronic obstructive pulmonary disease; TyG index, Triglyceride-Glucose index.

**Table S4** Weighted baseline characteristics of diabetic men stratified by TyG index tertiles

| **Variables** | **T1**  **(n=701)** | **T2**  **(n=739)** | **T3**  **(n=689)** | **P-value** |
| --- | --- | --- | --- | --- |
| Age (years) | 60.19±15.56 | 59.43±14.35 | 57.31±13.43 | 0.0181 |
| Race/ethnicity |  |  |  | <0.0001 |
| Non-Hispanic White | 60.27 | 68.90 | 68.52 |  |
| Non-Hispanic Black | 23.89 | 12.56 | 8.31 |  |
| Mexican American | 7.40 | 6.60 | 10.14 |  |
| Others | 8.44 | 11.93 | 13.03 |  |
| Education |  |  |  | 0.9682 |
| Below high school | 9.41 | 9.44 | 10.58 |  |
| High school graduate | 39.04 | 38.21 | 37.52 |  |
| Higher | 51.55 | 52.34 | 51.89 |  |
| Marital status |  |  |  | 0.044 |
| Married/partnered | 64.39 | 76.58 | 74.08 |  |
| Never married /divorced/ separated/widowed | 35.61 | 23.42 | 25.92 |  |
| PIR |  |  |  | 0.9608 |
| Low | 21.5 | 62.11 | 21.50 |  |
| Medium | 42.00 | 37.43 | 39.04 |  |
| High | 21.56 | 22.11 | 21.50 |  |
| Drinking |  |  |  | 0.082 |
| No | 24.70 | 15.70 | 20.37 |  |
| Yes | 75.30 | 84.30 | 79.63 |  |
| Smoking |  |  |  | 0.2795 |
| No | 46.35 | 41.38 | 38.60 |  |
| Yes | 53.65 | 58.62 | 61.40 |  |
| BMI (kg/m2) | 28.69±6.48 | 31.32± 7.08 | 32.37±7.04 | 0.0001 |
| Waist circumference (cm) | 103.04±19.69 | 110.82±16.74 | 112.39±18.75 | <0.0002 |
| COPD |  |  |  | 0.9107 |
| No | 90.30 | 91.70 | 91.56 |  |
| Yes | 9.70 | 8.30 | 8.44 |  |
| Hypertension |  |  |  | 0.4223 |
| No | 50.96 | 52.90 | 47.99 |  |
| Yes | 49.04 | 47.10 | 52.01 |  |
| Cardiovascular disease |  |  |  | 0.3887 |
| No | 88.72 | 92.89 | 92.28 |  |
| Yes | 11.28 | 7.11 | 7.72 |  |
| HCH |  |  |  | <0.0001 |
| No | 49.29 | 47.97 | 30.24 |  |
| Yes | 50.71 | 52.03 | 69.76 |  |
| TyG index | 8.02±0.33 | 8.66±0.16 | 9.65±0.64 | <0.0001 |

**Note:** The continuous variables were represented by mean ± SD. Categorical variables expressed as percentages. Absolute numbers are unweighted, observed values; Estimates were weighted.

**Abbreviations:** BMI, body mass index; PIR, poverty income ratio; HCH, hypercholesterolemia; COPD, chronic obstructive pulmonary disease; TyG index, Triglyceride-Glucose index.

**Table S5** Gender differences in the association between TyG index and COPD in a diabetic population

| **Variable** | **Non-adjusted** | **Model 1** | **Model 2** | **Model 3** |
| --- | --- | --- | --- | --- |
| Female |  |  |  |  |
| TyG | 1.32(1.02-1.71) | 1.24(0.91-1.67) | 1.10(0.73-1.66) | 1.07(0.69-1.64) |
| P-value | 0.037 | ＜0.172 | 0.649 | 0.772 |
| TyG tertile |  |  |  |  |
| T1 | 1(Ref) | 1(Ref) | 1(Ref) | 1(Ref) |
| T2 | 1.70(0.74-3.91) | 1.54(0.66-3.62) | 1.45(0.93-1.6) | 1.89(0.58-6.16) |
| T3 | 1.98(0.82-4.76) | 1.56(0.64-3.79) | 1.04(0.38-2.84) | 1.31(0.40-4.28) |
| P-trend | 0.119 | 0.395 | 0.680 | 0.882 |
| Male |  |  |  |  |
| TyG | 0.94(0.72-1.23) | 1.06(0.79-1.41) | 0.95(0.68-1.34) | 0.92(0.63-1.34) |
| P-value | 0.063 | 0.707 | 0.781 | 0.669 |
| TyG tertile |  |  |  |  |
| T1 | 1(Ref) | 1(Ref) | 1(Ref) | 1(Ref) |
| T2 | 0.84(0.37-1.90) | 0.92(0.37-2.29) | 0.65(0.24-1.75) | 0.63(0.24-1.64) |
| T3 | 0.86(0.41-1.78) | 0.99(0.42-2.33) | 0.67(0.28-1.63) | 0.60(0.24-1.47) |
| P-trend | 0.777 | 0.907 | 0.543 | 0.374 |

**Note:** Data presented are ORs and 95%Cls.

Model 1: adjusted for age, race/ethnicity, education level, marital status, PIR.

Model 2: adjusted for Model 1+ drinking, smoking, BMI, waist circumference.

Model 3: adjusted for Model 2+ hypertension, cardiovascular disease, hypercholesterolemia.
